# Supplementary material for: Investigation on the phosphine-free synthesis of CdSe nanocrystals by cadmium precursor injection
Source: Royal Society of Chemistry journal article supplement (doi:10.1039/b9nj00212j), 2009-01-01
Supplement: b9nj00212j.pdf [file b9nj00212j.pdf]

## Supporting Information For

### Investigation on phosphine-free synthesis of CdSe nanocrystals by cadmium precursor injection

Jin Zhong Niu, Huaibin Shen, Hongzhe Wang, Weiwei Xu, Shiyun Lou, Zuliang  
Du, and Lin Song Li<sup>\*[a]</sup>

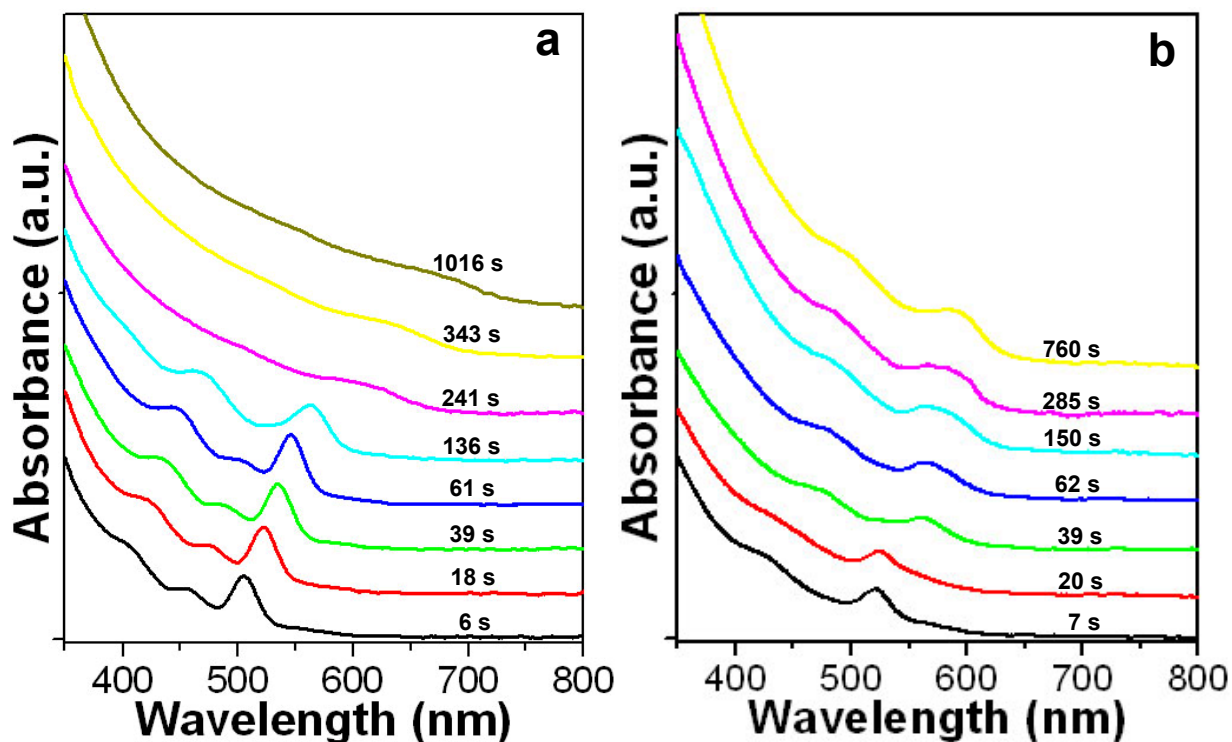

**Fig. S1** Temporal evolution of absorption spectra of synthesized CdSe nanocrystals using Se-OA-ODE (a) and Se-ODA-ODE (b) as the Se precursor with the Se: Cd molar ratio of 15:1.
